# Supplementary material for: Anti-cancer efficacy of SREBP inhibitor, alone or in combination with docetaxel, in prostate cancer harboring p53 mutations
Source: PubMed Central journal article supplement (PMC4747386; doi:10.18632/oncotarget.5879), 2015-10-16
Supplement: oncotarget-06-41018-s001.pdf [file oncotarget-06-41018-s001.pdf]

SUPPLEMENTARY FIGURE AND TABLE

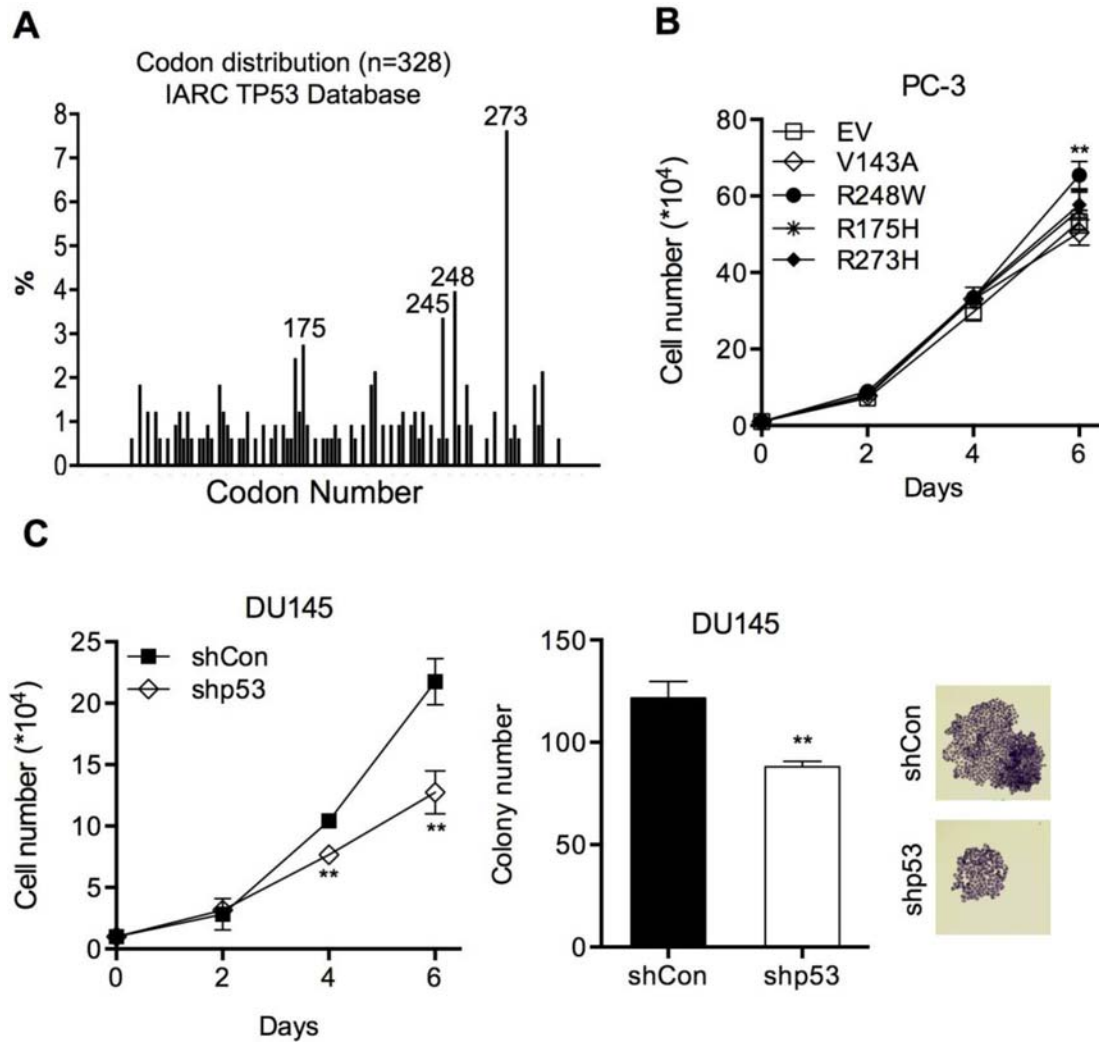

**Supplementary Figure S1: The effects of mutant p53 on cell growth and colony formation in PCa cells.** A. Distribution of human p53 gene mutations in PCa. B. Growth curve of PC-3 cells stably transfected with empty vector or various mutp53s.  $**P < 0.01$ . C. Growth curve (left panel) and colony formation (right panel) of DU145 cells infected with shp53 or shCon letivirus particles.  $**P < 0.01$ .

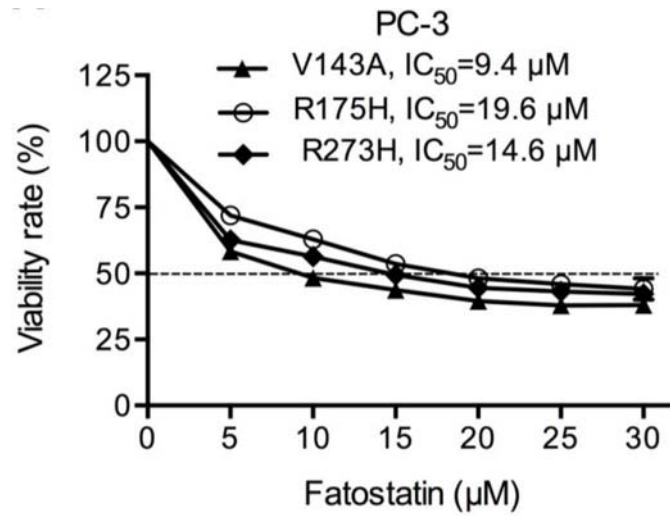

**Supplementary Figure S2: Fatostatin inhibited cell proliferation of PCa cells harboring p53 mutations.** PC-3 V143A, R175H and R273H cells were treated with various concentrations of fatostatin and incubated for 72 hours. The  $IC_{50}$  value of each cell line was calculated and shown from three independent experiments.

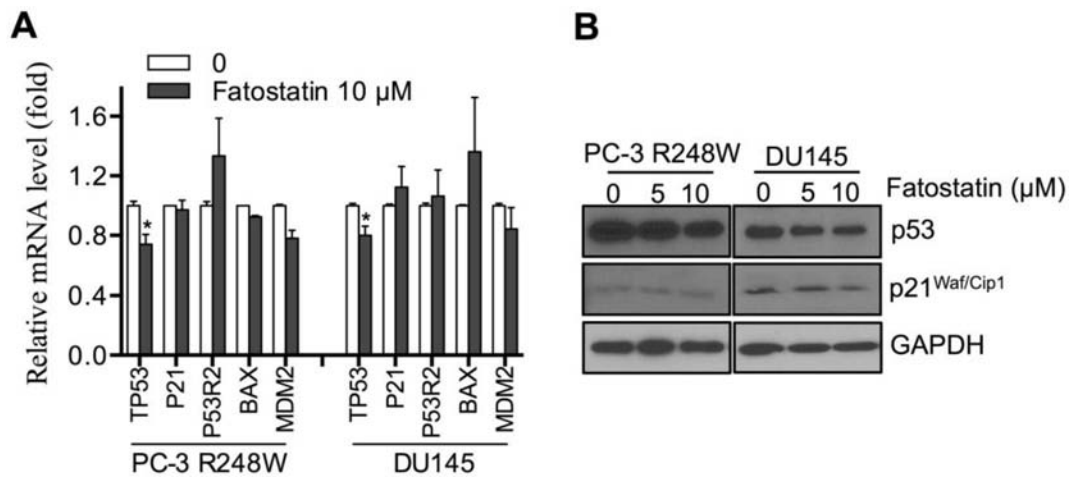

**Supplementary Figure S3: The effect of fatostatin on wild-type p53 downstream targets in PC-3 R248W and DU145 cells.** **A.** qPCR analysis of a series of wild-type p53 targets, including P21, P53R2, BAX and MDM2 in PC-3 R248W and DU145 cells treated with fatostatin for 6 hours. \* $P < 0.05$ . **B.** Western blot analysis of p53 and p21<sup>Waf/Cip1</sup> expression in PC-3 R248W and DU145 cells treated with fatostatin for 24 hours.

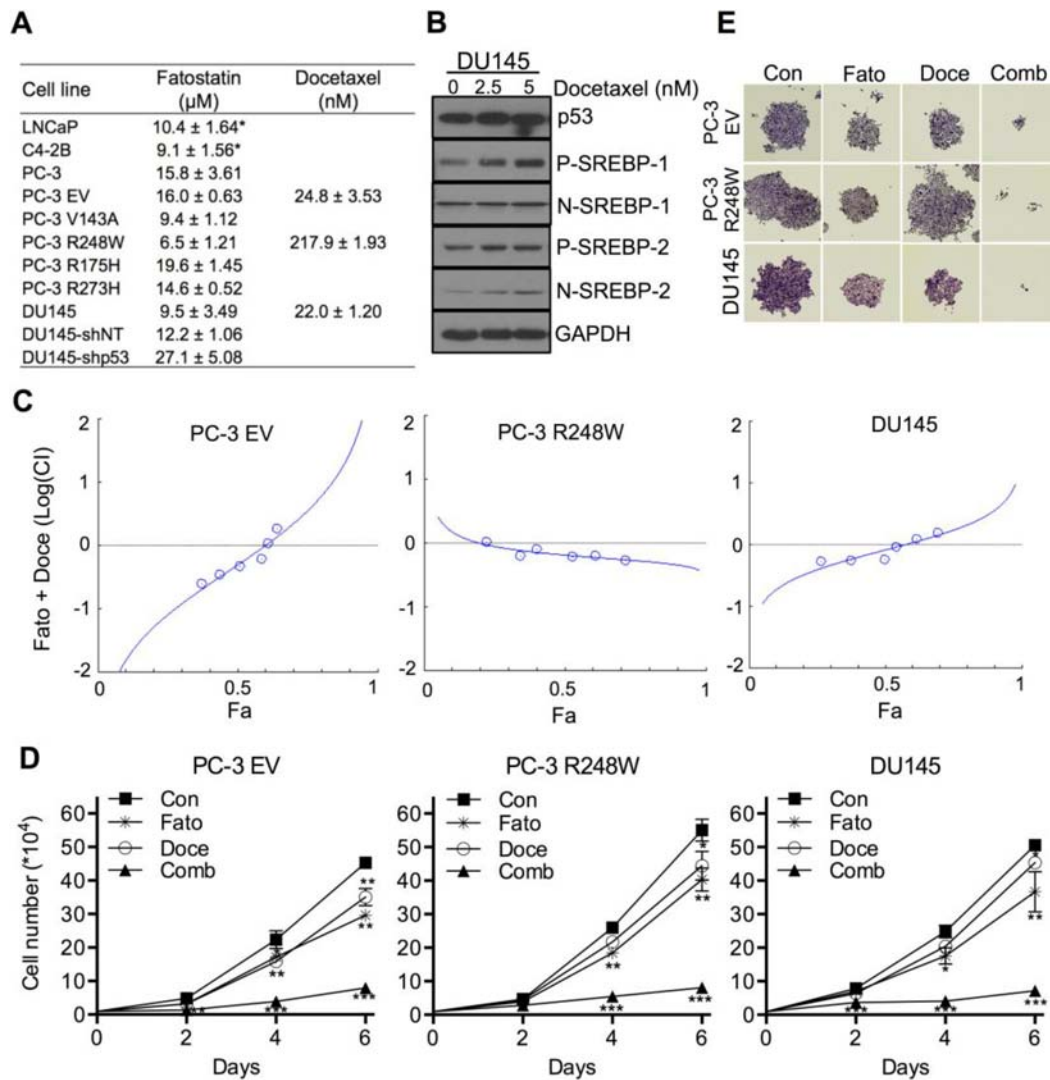

**Supplementary Figure S4: The combination of fatostatatin with docetaxel inhibited cell proliferation and colony formation in PCa cells harboring different p53 mutations.** **A.** The inhibitory effects of fatostatatin and docetaxel on PCa cells.  $IC_{50}$  was calculated and shown as the mean  $\pm$  SD of three independent experiments. \*, previously published data. **B.** Western blot analysis of p53, SREBP-1 and SREBP-2 expression in DU145 cells treated with docetaxel for 24 hours. *P* and *N* denote the precursor and nuclear forms of SREBP, respectively. **C.** The combination index (CI) values of fatostatatin and docetaxel in PC-3 EV, PC-3 R248W and DU145 cells were calculated using Calcsyn software and reported as Log (CI) for each fraction affected (Fa). Fato, fatostatatin; Doce, docetaxel. **D.** Cell growth of PC-3 EV, PC-3 R248W and DU145 cells treated with fatostatatin (2.5  $\mu\text{M}$ ), docetaxel (5.0 nM), alone or in combination. \* $P < 0.05$ , \*\* $P < 0.01$ , \*\*\* $P < 0.001$  compared with control. Con, control; Comb, combination. **E.** Images for colonies of PC-3 Vector, PC-3 R248W and DU145 cells treated with fatostatatin and docetaxel, alone or in combination.

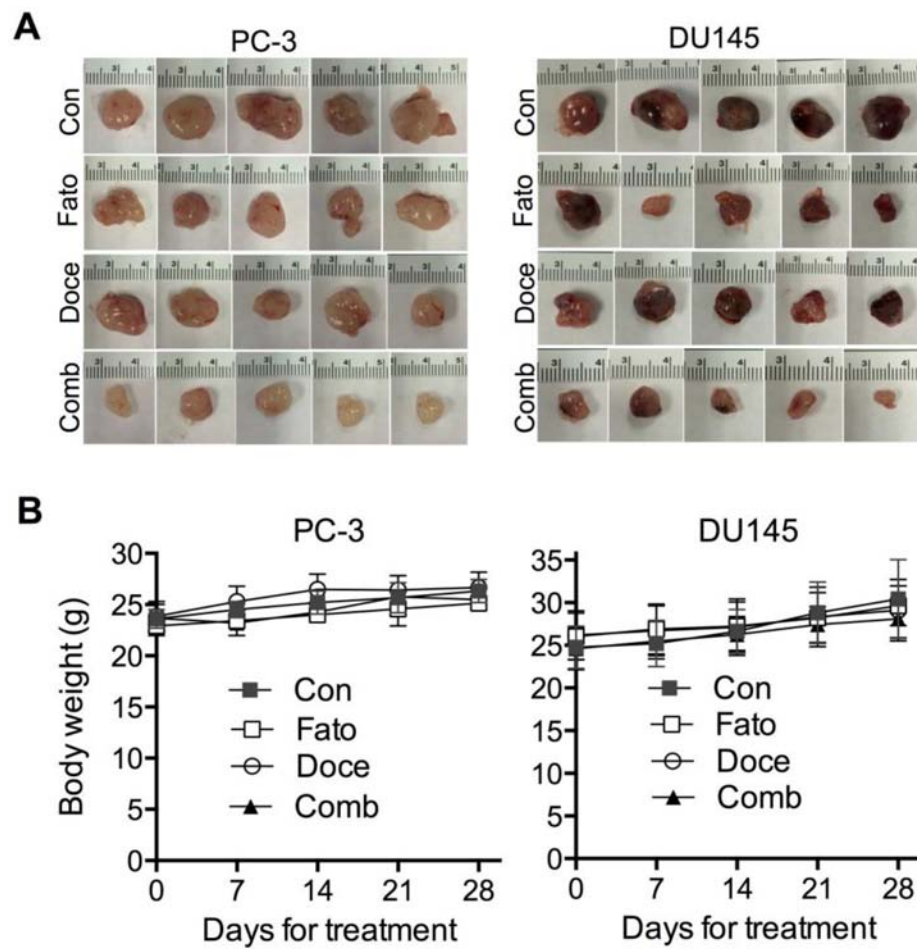

**Supplementary Figure S5: The combination of fatostatin with docetaxel inhibited PCa tumor growth in xenograft models.** **A.** Representative tumor images derived from PC-3 and DU145 tumor xenograft models treated with vehicle, fatostatin and/or docetaxel. **B.** Body weight of mice bearing PC-3 or DU145 tumors treated with vehicle, fatostatin and/or docetaxel. Con, Control; Fato, fatostatin; Doce, docetaxel; Comb, combination.

**Supplementary Table S1.** The sequences of primers used for qPCR

| Gene           | Forward (5'-3')          | Reverse (5'-3')           |
|----------------|--------------------------|---------------------------|
| TP53           | CCCAAGCAATGGATGATTTGA    | GGCATTCTGGGAGCTTCATCT     |
| SREBP-1        | TCAGCGAGGCGGCTTTGGAGCAG  | CATGTCTTCGATGTCGGTCAG     |
| ACL            | TGTAACAGACCAGGAACCC      | CTGTACCCCAGTGGCTGTTT      |
| FASN           | CGGTACGCGACGGCTGCCTG     | GCTGCTCCACGAACTCAAACACCG  |
| SCD-1          | CACTTGGGAGCCCTGTATGG     | AGCCGAGCTTTGTAAGAGCG      |
| SREBP-2        | CCCCTGACTTCCCTGCTGCA     | GCGCGAGTGTGGCCGGATC       |
| HMGCS1         | GAGGGCTTCGTGGGACACATA    | GCCACTGGGATGGATCTTT       |
| HMGCR          | GTCATTCCAGCCAAGTTGT      | GGGACCACTTGCTTCCATTA      |
| MVK            | CCTTGTGGCTGGCGTCAGAAA    | CGAGGGCATTGAGATGGTGCT     |
| MVD            | ACCACGGGGACACCACGGT      | CCACACAGCAGCCACAAACTC     |
| LDLR           | CAACGGCTCAGACGAGCAAG     | AGTCACAGACGAACTGCCGAGA    |
| INSIG1         | GGACGACAGTTAGCTATGGGTGTT | GAGTCATTTGTACAGTCAGCCCGA  |
| SCAP           | TATCTCGGGCCTTCTACAACCA   | ACACAACCTCCTCAAGCTCCTG    |
| P21            | GGCAGACCAGCATGACAGATT    | GCGGATTAGGGCTTCCTCT       |
| P53R2          | GAAAGGGTCAGGGAGATCAT     | TTCTGCCTGAAAAACCTTTG      |
| BAX            | TGG AGCTGCAGAGGATGATTG   | GAAGTTGCCGTCAGAAAACATG    |
| MDM2           | GCAAATGTGCAATACCAACATGTC | GCCAAACAAATCTCCTAGAAGATC  |
| $\beta$ -actin | CAAGGCCAACCGCGAGAAGATGAC | GCCAGAGGCGTACAGGGATAGCACA |
